# Supplementary material for: Bioprocessing of Barley and Lentil Grains to Obtain In Situ Synthesis of Exopolysaccharides and Composite Wheat Bread with Improved Texture and Health Properties
Source: MDPI journal article supplement (doi:10.3390/foods10071489), 2021-06-27
Supplement: s1 [file s1]

**Table S1** Recipes for control and sourdough breads. CWB, control wheat bread started with baker's yeast; SB-SL SWB EPS NEG, bread containing wheat flour added with 30% (w/w) sprouted barley-sprouted lentil (30:70%) sourdough fermented by *Leuconostoc pseudomesenteroides* DSM 20193; SB-SL SWB EPS POS, bread containing wheat flour added of 30% (w/w) dextran-containing sprouted barley-sprouted lentil (30:70% w/w) sourdough fermented by *L. pseudomesenteroides* DSM 20193. The strain was inoculated at ca. 7 log cfu/g and sourdough fermented at 20 °C for 24 h. Doughs for bread making had DY 162.

| Recipes                      | CWB                   |                     | SB-SL SWB<br>EPS NEG |        | SB-SL WB<br>EPS POS |        |
|------------------------------|-----------------------|---------------------|----------------------|--------|---------------------|--------|
|                              | % d.w. <sup>1</sup>   | % f.w. <sup>2</sup> | % d.w.               | % f.w. | % d.w.              | % f.w. |
| <b>Sourdough composition</b> | Sprouted barley flour |                     | 2.7                  | 4.5    | 2.7                 | 4.5    |
|                              | Sprouted lentil flour |                     | 6.4                  | 10.5   | 6.4                 | 10.5   |
|                              | Water                 |                     | 21.2                 | 35     | 21.2                | 35     |
|                              | Sucrose               |                     | 1.5                  | 2.4    | 1.5                 | 2.4    |
| <b>Bread</b>                 |                       |                     |                      |        |                     |        |
| <b>Sourdough</b>             | -                     | -                   | 30.3                 | 49     | 30.3                | 49     |
| <b>Wheat flour</b>           | 61.7                  | 100                 | 51.7                 | 85     | 51.7                | 85     |
| <b>Water</b>                 | 38.3                  | 62                  | 17.1                 | 28     | 17.1                | 28     |
| <b>Fresh yeast</b>           | 0.7                   | 1.1                 | 0.7                  | 1.1    | 0.7                 | 1.1    |
| <b>Salt</b>                  | 1.1                   | 1.8                 | 1.1                  | 1.8    | 1.1                 | 1.8    |
| <b>Flour Sum</b>             | 61.7                  | 100.0               | 61.7                 | 100.0  | 61.7                | 100.0  |
| <b>Water sum</b>             | 38.3                  | 62.0                | 38.3                 | 62.0   | 38.3                | 62.0   |

<sup>1</sup>d.w., dough weight

<sup>2</sup>f.w., flour weight

**Table S2** Acidity (pH) and viscosity ( $\text{Pa s}^{-1}$ ) values for doughs without sucrose addition (EPS NEG) and sucrose-supplemented (EPS POS) (16% of flour weight) obtained from native barley (B), sprouted barley (SB) and blends of sprouted barley with native lentil (SB-L) or sprouted lentil (SB-SL) flours at different ratio (60:40 and 70:30 ratios), before (T0 h ) and after (T24 h) fermentation at 20°C and 25°C by *Lactobacillus plantarum* DPPMAB24W (B24W) as non EPS producing strain or with the selected dextran-producing strains *Weissella confusa* SLA4 (SLA4), *Weissella paramesenteroides* SLA5 (SLA5), *Leuconostoc pseudomesenteroides* DSM 20193 (20193) and *Weissella confusa* DSM 20194 (20194). Doughs prepared without starter and without the addition of sucrose were used as control (CT).

| DY <sup>1</sup> | Sucrose                   | Dough Code                | Fermentation at 20 °C     |              |              |              | Fermentation at 25 °C |              |              |              |
|-----------------|---------------------------|---------------------------|---------------------------|--------------|--------------|--------------|-----------------------|--------------|--------------|--------------|
|                 |                           |                           | T0 h                      |              | T24 h        |              | T0 h                  |              | T24 h        |              |
|                 |                           |                           | pH                        | Viscosity    | pH           | Viscosity    | pH                    | Viscosity    | pH           | Viscosity    |
| 500             |                           |                           | Native barley sourdough   |              |              |              |                       |              |              |              |
|                 | -                         | B_CT                      | 5.81 ± 0.14b              | 0.19 ± 0.02b | 4.42 ± 0.18b | 0.21 ± 0.13b | 5.8 ± 0.04c           | 0.17 ± 0.02c | 4.27 ± 0.16b | 0.19 ± 0.06b |
|                 | +                         | B-B24W                    | 5.84 ± 0.15b              | 0.16 ± 0.07c | 3.66 ± 0.24c | 0.23 ± 0.15b | 5.85 ± 0.1c           | 0.21 ± 0.08b | 3.56 ± 0.17c | 0.23 ± 0.1b  |
|                 | +                         | B-SLA4_EPS<br>POS         | 5.85 ± 0.09b              | 0.14 ± 0.1c  | 3.74 ± 0.25c | 0.3 ± 0.16b  | 5.83 ± 0.14c          | 0.16 ± 0.1c  | 3.63 ± 0.16c | 0.39 ± 0.13b |
|                 | -                         | B-SLA4_EPS<br>NEG         | 5.81 ± 0.08b              | 0.13 ± 0.12c | 3.7 ± 0.26c  | 0.32 ± 0.16b | 5.79 ± 0.06c          | 0.15 ± 0.12c | 3.68 ± 0.01c | 0.37 ± 0.14b |
|                 | +                         | B-SLA5_EPS<br>POS         | 5.83 ± 0.11b              | 0.15 ± 0.05c | 3.91 ± 0.08c | 0.3 ± 0.16b  | 5.81 ± 0.17c          | 0.16 ± 0.13c | 3.74 ± 0.19c | 0.43 ± 0.02b |
|                 | -                         | B-SLA5_EPS<br>NEG         | 5.75 ± 0.12b              | 0.12 ± 0.15c | 3.88 ± 0.05c | 0.33 ± 0.03b | 5.86 ± 0.19c          | 0.14 ± 0.11c | 3.82 ± 0.2c  | 0.35 ± 0.15b |
|                 | +                         | B-<br>DSM20193_EPS<br>POS | 5.87 ± 0.03b              | 0.14 ± 0.02c | 3.9 ± 0.19c  | 0.35 ± 0.17b | 5.84 ± 0.2c           | 0.17 ± 0.15c | 3.83 ± 0.21c | 0.39 ± 0.15b |
|                 | -                         | B-<br>DSM20193_EPS<br>NEG | 5.77 ± 0.05b              | 0.11 ± 0.16c | 3.97 ± 0.3c  | 0.22 ± 0.34b | 5.81 ± 0.21c          | 0.13 ± 0.01c | 3.88 ± 0.08b | 0.31 ± 0.36b |
|                 | +                         | B-<br>DSM20194_EPS<br>POS | 5.81 ± 0.04b              | 0.15 ± 0.16c | 3.95 ± 0.03c | 0.3 ± 0.14b  | 5.81 ± 0.22c          | 0.14 ± 0.16c | 3.62 ± 0.22c | 0.39 ± 0.36b |
| -               | B-<br>DSM20194_EPS<br>NEG | 5.9 ± 0.15b               | 0.16 ± 0.17c              | 3.91 ± 0.24c | 0.32 ± 0.34b | 5.78 ± 0.08c | 0.17 ± 0.17c          | 3.6 ± 0.02c  | 0.43 ± 0.14b |              |
| 500             |                           |                           | Sprouted barley sourdough |              |              |              |                       |              |              |              |
|                 | -                         | SB_CT                     | 5.83 ± 0.06b              | 0.11 ± 0.01c | 4.01 ± 0.31c | 0.22 ± 0.33b | 5.83 ± 0.22c          | 0.13 ± 0.03c | 3.82 ± 0.03c | 0.35 ± 0.44b |
|                 | +                         | SB-B24W                   | 5.84 ± 0.03b              | 0.13 ± 0.16c | 3.62 ± 0.35c | 0.26 ± 0.03b | 5.84 ± 0.22c          | 0.14 ± 0.17c | 3.51 ± 0.24c | 0.37 ± 0.05b |
|                 | +                         | SB-SLA4_EPS<br>POS        | 5.81 ± 0.15b              | 0.16 ± 0.16c | 3.75 ± 0.34c | 0.32 ± 0.32b | 5.82 ± 0.22c          | 0.18 ± 0.16b | 3.73 ± 0.22c | 0.39 ± 0.44b |

|                                                                |                               |              |              |              |              |              |              |              |              |
|----------------------------------------------------------------|-------------------------------|--------------|--------------|--------------|--------------|--------------|--------------|--------------|--------------|
| -                                                              | SB-SLA4_EPS<br>NEG            | 5.83 ± 0.15b | 0.14 ± 0.01c | 3.77 ± 0.33c | 0.28 ± 0.32b | 5.84 ± 0.21c | 0.18 ± 0.16b | 3.76 ± 0.22c | 0.43 ± 0.01b |
| +                                                              | SB-SLA5_EPS<br>POS            | 5.8 ± 0.14b  | 0.13 ± 0.15c | 3.72 ± 0.32c | 0.26 ± 0.31b | 5.81 ± 0.07c | 0.14 ± 0.05c | 3.61 ± 0.21c | 0.35 ± 0.43b |
| -                                                              | SB-SLA5_EPS<br>NEG            | 5.75 ± 0.14b | 0.15 ± 0.14c | 3.74 ± 0.3c  | 0.3 ± 0.05b  | 5.77 ± 0.2c  | 0.15 ± 0.15c | 3.68 ± 0.2c  | 0.33 ± 0.23b |
| +                                                              | SB-<br>DSM20193_EPS<br>POS    | 5.85 ± 0.11b | 0.16 ± 0.13c | 3.71 ± 0.28c | 0.63 ± 0.29b | 5.86 ± 0.18c | 0.17 ± 0.14c | 3.72 ± 0.19c | 0.39 ± 0.42b |
| -                                                              | SB-<br>DSM20193_EPS<br>NEG    | 5.83 ± 0.15b | 0.13 ± 0.11c | 3.83 ± 0.26c | 0.33 ± 0.41b | 5.84 ± 0.16c | 0.12 ± 0.13c | 3.78 ± 0.17c | 0.31 ± 0.04b |
| +                                                              | SB-<br>DSM20194_EPS<br>POS    | 5.87 ± 0.15b | 0.12 ± 0.09c | 3.78 ± 0.24c | 0.73 ± 0.01b | 5.83 ± 0.15c | 0.12 ± 0.11c | 3.67 ± 0.16c | 0.29 ± 0.48b |
| -                                                              | SB-<br>DSM20194_EPS<br>NEG    | 5.78 ± 0.07b | 0.19 ± 0.06  | 3.65 ± 0.22c | 0.45 ± 0.4b  | 5.71 ± 0.12c | 0.14 ± 0.08c | 3.78 ± 0.14c | 0.35 ± 0.51b |
| <b>Sprouted barley-sprouted lentil sourdough (40:60 ratio)</b> |                               |              |              |              |              |              |              |              |              |
| -                                                              | SB-SL_CT                      | 6.23 ± 0.16a | 0.45 ± 0.02a | 4.75 ± 0.17a | 0.63 ± 0.39b | 6.24 ± 0.02b | 0.48 ± 0.02a | 4.31 ± 0a    | 0.74 ± 0.11b |
| +                                                              | SB-SL-B24W                    | 6.26 ± 0.16a | 0.47 ± 0.03a | 4.21 ± 0.16b | 0.71 ± 0.39b | 6.26 ± 0.03b | 0.45 ± 0.02b | 3.83 ± 0.12b | 0.79 ± 0.51b |
| +                                                              | SB-SL-<br>SLA5_EPS POS        | 6.2 ± 0.18a  | 0.49 ± 0.03a | 4.23 ± 0.16b | 0.51 ± 0.29b | 6.2 ± 0.03b  | 0.49 ± 0.03a | 4.06 ± 0.01b | 0.61 ± 0.51b |
| -                                                              | SB-SL-<br>SLA5_EPS NEG        | 6.21 ± 0.01a | 0.45 ± 0a    | 4.37 ± 0.16b | 0.48 ± 0.09b | 6.23 ± 0.02b | 0.47 ± 0a    | 4.09 ± 0.12b | 0.64 ± 0.02b |
| +                                                              | SB-SL-<br>SLA4_EPS POS        | 6.24 ± 0.04a | 0.46 ± 0.03a | 4.24 ± 0.16b | 0.53 ± 0.39b | 6.21 ± 0.02b | 0.48 ± 0.03a | 4.12 ± 0.12b | 0.5 ± 0.5b   |
| -                                                              | SB-SL-<br>SLA4_EPS NEG        | 6.27 ± 0.08a | 0.48 ± 0a    | 4.28 ± 0.16b | 0.55 ± 0.31b | 6.23 ± 0.02b | 0.46 ± 0.03a | 4.16 ± 0b    | 0.65 ± 0.04b |
| +                                                              | SB-SL-<br>DSM20193_EPS<br>POS | 6.21 ± 0.09a | 0.45 ± 0.03a | 4.2 ± 0.16b  | 1.77 ± 0.39a | 6.23 ± 0.02b | 0.47 ± 0a    | 4 ± 0.12b    | 1.93 ± 0.48a |

333

|     |   |                               |                  |                  |                  |                  |                  |                  |                  |                  |
|-----|---|-------------------------------|------------------|------------------|------------------|------------------|------------------|------------------|------------------|------------------|
| 350 | - | SB-SL-<br>DSM20193_EPS<br>NEG | $6.19 \pm 0.12a$ | $0.48 \pm 0.01a$ | $4.23 \pm 0.05b$ | $0.6 \pm 0.03b$  | $6.28 \pm 0.02a$ | $0.48 \pm 0.03a$ | $4.04 \pm 0.02b$ | $0.49 \pm 0.02b$ |
|     | + | SB-SL-<br>DSM20194_EPS<br>POS | $6.22 \pm 0.13a$ | $0.47 \pm 0.03a$ | $4.21 \pm 0b$    | $0.63 \pm 0.43b$ | $6.21 \pm 0.02b$ | $0.51 \pm 0.03a$ | $4.11 \pm 0.12b$ | $1.72 \pm 0.48a$ |
|     | - | SB-SL-<br>DSM20194_EPS<br>NEG | $6.18 \pm 0.01a$ | $0.45 \pm 0.02a$ | $4.33 \pm 0.16b$ | $0.51 \pm 0.43b$ | $6.25 \pm 0.02b$ | $0.47 \pm 0.03a$ | $4.14 \pm 0.03b$ | $0.63 \pm 0.03b$ |
|     | - | SB-SL_CT                      | $6.29 \pm 0.05a$ | $0.39 \pm 0.02b$ | $4.74 \pm 0.01a$ | $0.44 \pm 0.33b$ | $6.25 \pm 0.02b$ | $0.43 \pm 0b$    | $4.31 \pm 0.12a$ | $0.84 \pm 0.5b$  |
|     | + | SB-SL-B24W                    | $6.31 \pm 0.01a$ | $0.42 \pm 0.03b$ | $4.24 \pm 0.12b$ | $0.58 \pm 0.44b$ | $6.26 \pm 0.02b$ | $0.42 \pm 0.05b$ | $3.83 \pm 0.08b$ | $0.79 \pm 0.05b$ |
|     | + | SB-SL-<br>SLA5_EPS POS        | $6.25 \pm 0.02a$ | $0.41 \pm 0.05b$ | $4.24 \pm 0.15b$ | $0.76 \pm 0.14b$ | $6.23 \pm 0.02b$ | $0.47 \pm 0.01a$ | $4.06 \pm 0.14b$ | $0.95 \pm 0.56b$ |
|     | - | SB-SL-<br>SLA5_EPS NEG        | $6.27 \pm 0.01a$ | $0.45 \pm 0.05a$ | $4.36 \pm 0.15b$ | $0.47 \pm 0.47b$ | $6.24 \pm 0.02b$ | $0.5 \pm 0.06a$  | $4.09 \pm 0.15b$ | $0.64 \pm 0.58b$ |
|     | + | SB-SL-<br>SLA4_EPS POS        | $6.3 \pm 0.16a$  | $0.46 \pm 0.06a$ | $4.25 \pm 0.14b$ | $0.59 \pm 0.39b$ | $6.21 \pm 0.02b$ | $0.44 \pm 0.07b$ | $4.12 \pm 0.15b$ | $0.84 \pm 0.03b$ |
|     | - | SB-SL-<br>SLA4_EPS NEG        | $6.33 \pm 0.16a$ | $0.45 \pm 0a$    | $4.27 \pm 0.14b$ | $0.48 \pm 0.47b$ | $6.23 \pm 0.02b$ | $0.51 \pm 0.07a$ | $4.16 \pm 0.16b$ | $0.65 \pm 0.59b$ |
|     | + | SB-SL-<br>DSM20193_EPS<br>POS | $6.26 \pm 0.16a$ | $0.41 \pm 0.05b$ | $4.21 \pm 0.14b$ | $1.89 \pm 0.47a$ | $6.22 \pm 0.02b$ | $0.49 \pm 0a$    | $4 \pm 0.16b$    | $1.94 \pm 0.59a$ |
| 400 | - | SB-SL-<br>DSM20193_EPS<br>NEG | $6.24 \pm 0.01a$ | $0.44 \pm 0.05a$ | $4.25 \pm 0b$    | $0.59 \pm 0.26b$ | $6.25 \pm 0.02b$ | $0.48 \pm 0.06a$ | $4.04 \pm 0.01b$ | $0.53 \pm 0.49b$ |
|     | + | SB-SL-<br>DSM20194_EPS<br>POS | $6.28 \pm 0.16a$ | $0.43 \pm 0.04b$ | $4.22 \pm 0.15b$ | $0.84 \pm 0.56b$ | $6.25 \pm 0.02b$ | $0.44 \pm 0.05b$ | $4.11 \pm 0.17b$ | $1.82 \pm 0.29a$ |
|     | - | SB-SL-<br>DSM20194_EPS<br>NEG | $6.24 \pm 0.08a$ | $0.42 \pm 0.03b$ | $4.32 \pm 0.02b$ | $0.53 \pm 0.56b$ | $6.22 \pm 0.02b$ | $0.42 \pm 0.04b$ | $4.14 \pm 0.17b$ | $0.66 \pm 0.32b$ |
|     | - | SB-SL_CT                      | $6.28 \pm 0.16a$ | $0.35 \pm 0.02b$ | $4.6 \pm 0.15a$  | $0.3 \pm 0.47b$  | $6.2 \pm 0.03b$  | $0.36 \pm 0.01b$ | $4.44 \pm 0.06a$ | $0.37 \pm 0.34b$ |
|     | + | SB-SL-B24W                    | $6.22 \pm 0.11a$ | $0.32 \pm 0.04b$ | $4.02 \pm 0.17c$ | $0.33 \pm 0.56b$ | $6.22 \pm 0b$    | $0.38 \pm 0.05b$ | $3.91 \pm 0.18b$ | $0.39 \pm 0.01b$ |

|     |   |                               |                  |                  |                  |                  |                  |                  |                  |                  |
|-----|---|-------------------------------|------------------|------------------|------------------|------------------|------------------|------------------|------------------|------------------|
| 450 | + | SB-SL-<br>SLA5_EPS POS        | $6.2 \pm 0.16a$  | $0.33 \pm 0.06b$ | $4.23 \pm 0.15b$ | $0.37 \pm 0.51b$ | $6.21 \pm 0.02b$ | $0.32 \pm 0.06b$ | $3.94 \pm 0.19b$ | $0.41 \pm 0.36b$ |
|     | - | SB-SL-<br>SLA5_EPS NEG        | $6.22 \pm 0.12a$ | $0.31 \pm 0.06b$ | $4.26 \pm 0.15b$ | $0.43 \pm 0.56b$ | $6.23 \pm 0.02b$ | $0.34 \pm 0b$    | $3.99 \pm 0.2b$  | $0.37 \pm 0.27b$ |
|     | + | SB-SL-<br>SLA4_EPS POS        | $6.23 \pm 0.16a$ | $0.32 \pm 0.06b$ | $4.2 \pm 0.02b$  | $0.55 \pm 0.06b$ | $6.2 \pm 0.02b$  | $0.31 \pm 0.06b$ | $3.92 \pm 0.21b$ | $0.8 \pm 0.17b$  |
|     | - | SB-SL-<br>SLA4_EPS NEG        | $6.25 \pm 0.13a$ | $0.37 \pm 0b$    | $4.24 \pm 0.14b$ | $0.49 \pm 0.57b$ | $6.24 \pm 0b$    | $0.36 \pm 0.01b$ | $3.95 \pm 0.2b$  | $0.57 \pm 0.37b$ |
|     | + | SB-SL-<br>DSM20193_EPS<br>POS | $6.26 \pm 0.01a$ | $0.31 \pm 0.01b$ | $4.26 \pm 0.13b$ | $2.2 \pm 0.27a$  | $6.24 \pm 0.02b$ | $0.3 \pm 0.06b$  | $3.9 \pm 0.19b$  | $1.4 \pm 0.38a$  |
|     | - | SB-SL-<br>DSM20193_EPS<br>NEG | $6.2 \pm 0.15a$  | $0.34 \pm 0.06b$ | $4.38 \pm 0.12b$ | $0.61 \pm 0.37b$ | $6.23 \pm 0.02b$ | $0.38 \pm 0.06b$ | $3.94 \pm 0.07b$ | $0.75 \pm 0.29b$ |
|     | + | SB-SL-<br>DSM20194_EPS<br>POS | $6.24 \pm 0.16a$ | $0.34 \pm 0.06b$ | $4.23 \pm 0.12b$ | $0.5 \pm 0.38b$  | $6.27 \pm 0.03a$ | $0.34 \pm 0.05b$ | $3.92 \pm 0.16b$ | $0.9 \pm 0.29b$  |
|     | - | SB-SL-<br>DSM20194_EPS<br>NEG | $6.29 \pm 0.22a$ | $0.38 \pm 0.05b$ | $4.36 \pm 0.11b$ | $0.42 \pm 0.39b$ | $6.27 \pm 0.02a$ | $0.3 \pm 0.04b$  | $4.01 \pm 0.12b$ | $0.38 \pm 0.01b$ |
|     | - | SB-SL_CT                      | $6.24 \pm 0.17a$ | $0.22 \pm 0.03b$ | $4.7 \pm 0.11a$  | $0.33 \pm 0.39b$ | $6.23 \pm 0.02b$ | $0.2 \pm 0.03b$  | $4.5 \pm 0.1a$   | $0.24 \pm 0.02b$ |
|     | + | SB-SL-B24W                    | $6.2 \pm 0.05a$  | $0.2 \pm 0.03b$  | $4.36 \pm 0.19b$ | $0.38 \pm 0.02b$ | $6.2 \pm 0b$     | $0.22 \pm 0b$    | $4.25 \pm 0.19b$ | $0.28 \pm 0.18b$ |
|     | + | SB-SL-<br>SLA5_EPS POS        | $6.22 \pm 0.04a$ | $0.26 \pm 0.03b$ | $4.41 \pm 0.19b$ | $0.4 \pm 0.41b$  | $6.25 \pm 0.02b$ | $0.25 \pm 0.03b$ | $4.22 \pm 0.19b$ | $0.28 \pm 0.05b$ |
|     | - | SB-SL-<br>SLA5_EPS NEG        | $6.21 \pm 0.01a$ | $0.3 \pm 0.04b$  | $4.38 \pm 0.2b$  | $0.37 \pm 0.28b$ | $6.22 \pm 0.02b$ | $0.29 \pm 0.04b$ | $4.28 \pm 0a$    | $0.34 \pm 0.26b$ |
|     | + | SB-SL-<br>SLA4_EPS POS        | $6.2 \pm 0.08a$  | $0.24 \pm 0.03b$ | $4.44 \pm 0.19b$ | $0.91 \pm 0.42b$ | $6.23 \pm 0.02b$ | $0.21 \pm 0b$    | $4.2 \pm 0.02b$  | $0.7 \pm 0.27b$  |
|     | - | SB-SL-<br>SLA4_EPS NEG        | $6.26 \pm 0.01a$ | $0.25 \pm 0.03b$ | $4.54 \pm 0.2b$  | $0.33 \pm 0.4b$  | $6.24 \pm 0.02b$ | $0.25 \pm 0.04b$ | $4.18 \pm 0.08b$ | $0.33 \pm 0.25b$ |

|     |   |                               |                  |                  |                  |                  |                  |                  |                  |                  |
|-----|---|-------------------------------|------------------|------------------|------------------|------------------|------------------|------------------|------------------|------------------|
| 500 | + | SB-SL-<br>DSM20193_EPS<br>POS | $6.24 \pm 0.03a$ | $0.21 \pm 0.03b$ | $4.4 \pm 0.2b$   | $1.5 \pm 0.01a$  | $6.24 \pm 0b$    | $0.22 \pm 0.04b$ | $4.22 \pm 0.07b$ | $1 \pm 0a$       |
|     | - | SB-SL-<br>DSM20193_EPS<br>NEG | $6.22 \pm 0.05a$ | $0.27 \pm 0.03b$ | $4.38 \pm 0.2b$  | $0.25 \pm 0.39b$ | $6.19 \pm 0b$    | $0.2 \pm 0.01b$  | $4.15 \pm 0.04b$ | $0.21 \pm 0.05b$ |
|     | + | SB-SL-<br>DSM20194_EPS<br>POS | $6.26 \pm 0.11a$ | $0.23 \pm 0.03b$ | $4.43 \pm 0.2b$  | $0.7 \pm 0.19b$  | $6.21 \pm 0.02b$ | $0.24 \pm 0.02b$ | $4.21 \pm 0.18b$ | $0.3 \pm 0b$     |
|     | - | SB-SL-<br>DSM20194_EPS<br>NEG | $6.24 \pm 0.25a$ | $0.25 \pm 0b$    | $4.35 \pm 0.2b$  | $0.42 \pm 0.39b$ | $6.23 \pm 0.02b$ | $0.27 \pm 0.04b$ | $4.24 \pm 0.18b$ | $0.32 \pm 0.05b$ |
|     | - | SB-SL_CT                      | $6.26 \pm 0.04a$ | $0.21 \pm 0.03b$ | $5 \pm 0.2a$     | $0.24 \pm 0.4b$  | $6.23 \pm 0.02b$ | $0.22 \pm 0.03b$ | $4.8 \pm 0.01a$  | $0.25 \pm 0.03b$ |
|     | + | SB-SL-B24W                    | $6.2 \pm 0.03a$  | $0.18 \pm 0.1b$  | $4.39 \pm 0.15b$ | $0.2 \pm 0.23b$  | $6.21 \pm 0.04b$ | $0.21 \pm 0.11b$ | $4.41 \pm 0.13a$ | $0.24 \pm 0.11b$ |
|     | + | SB-SL-<br>SLA5_EPS POS        | $6.23 \pm 0.16a$ | $0.19 \pm 0.13b$ | $4.63 \pm 0.17a$ | $0.21 \pm 0.39b$ | $6.24 \pm 0.06b$ | $0.16 \pm 0.16c$ | $4.22 \pm 0.16b$ | $0.18 \pm 0.16b$ |
|     | - | SB-SL-<br>SLA5_EPS NEG        | $6.26 \pm 0.16a$ | $0.17 \pm 0.14b$ | $4.44 \pm 0.16b$ | $0.23 \pm 0.37b$ | $6.2 \pm 0.06b$  | $0.15 \pm 0.19c$ | $4.25 \pm 0.19b$ | $0.16 \pm 0.19b$ |
|     | + | SB-SL-<br>SLA4_EPS POS        | $6.25 \pm 0.16a$ | $0.23 \pm 0.15b$ | $4.62 \pm 0.01a$ | $0.25 \pm 0.13b$ | $6.27 \pm 0.06a$ | $0.19 \pm 0.19b$ | $4.43 \pm 0.23a$ | $0.21 \pm 0.19b$ |
|     | - | SB-SL-<br>SLA4_EPS NEG        | $6.22 \pm 0.16a$ | $0.25 \pm 0.16b$ | $4.56 \pm 0.16b$ | $0.23 \pm 0.36b$ | $6.24 \pm 0.05b$ | $0.17 \pm 0.01c$ | $4.36 \pm 0.23a$ | $0.19 \pm 0b$    |
|     | + | SB-SL-<br>DSM20193_EPS<br>POS | $6.24 \pm 0.16a$ | $0.22 \pm 0b$    | $4.4 \pm 0.15b$  | $1.43 \pm 0.34a$ | $6.22 \pm 0.05b$ | $0.24 \pm 0.18b$ | $4.21 \pm 0.26b$ | $0.26 \pm 0.19b$ |
|     | - | SB-SL-<br>DSM20193_EPS<br>NEG | $6.21 \pm 0.16a$ | $0.26 \pm 0.16b$ | $4.37 \pm 0.15b$ | $0.24 \pm 0.49b$ | $6.19 \pm 0.05b$ | $0.23 \pm 0.17b$ | $4.23 \pm 0.01b$ | $0.25 \pm 0.48b$ |
|     | + | SB-SL-<br>DSM20194_EPS<br>POS | $6.21 \pm 0.16a$ | $0.18 \pm 0.14b$ | $4.41 \pm 0.16b$ | $0.75 \pm 0.4b$  | $6.21 \pm 0.05b$ | $0.19 \pm 0.16b$ | $4.42 \pm 0.29a$ | $0.21 \pm 0.47b$ |

|            |                                                                |                               |              |              |              |              |              |              |              |              |
|------------|----------------------------------------------------------------|-------------------------------|--------------|--------------|--------------|--------------|--------------|--------------|--------------|--------------|
|            | -                                                              | SB-SL-<br>DSM20194_EPS<br>NEG | 6.22 ± 0.16a | 0.25 ± 0.1b  | 4.39 ± 0.01b | 0.27 ± 0.92b | 6.25 ± 0.04b | 0.22 ± 0.11b | 4.31 ± 0.27a | 0.24 ± 0.13b |
|            | <b>Sprouted barley-sprouted lentil sourdough (30:70 ratio)</b> |                               |              |              |              |              |              |              |              |              |
| <b>333</b> | -                                                              | SB-SL_CT                      | 6.1 ± 0.03a  | 0.52 ± 0.03a | 4.81 ± 0.17a | 0.57 ± 0.9b  | 6.12 ± 0.02b | 0.54 ± 0.03a | 4.61 ± 0.26a | 0.56 ± 0.5b  |
|            | +                                                              | SB-SL-B24W                    | 6.11 ± 0.08a | 0.51 ± 0.06a | 4.22 ± 0.16b | 0.56 ± 0.65b | 6.1 ± 0.02b  | 0.59 ± 0.06a | 4.04 ± 0.02b | 0.61 ± 0.51b |
|            | +                                                              | SB-SL-<br>SLA5_EPS POS        | 6.14 ± 0.04a | 0.5 ± 0.07a  | 4.41 ± 0.16b | 0.53 ± 0.88b | 6.13 ± 0.02b | 0.6 ± 0.08a  | 3.94 ± 0.26b | 0.63 ± 0.22b |
|            | -                                                              | SB-SL-<br>SLA5_EPS NEG        | 6.17 ± 0.01a | 0.55 ± 0.08a | 4.46 ± 0.16b | 0.57 ± 0.92b | 6.16 ± 0.02b | 0.56 ± 0a    | 3.91 ± 0.26b | 0.59 ± 0.43b |
|            | +                                                              | SB-SL-<br>SLA4_EPS POS        | 6.12 ± 0.01a | 0.57 ± 0.09a | 4.33 ± 0.16b | 0.9 ± 0.93b  | 6.14 ± 0.02b | 0.55 ± 0.09a | 4 ± 0.26b    | 0.57 ± 0.05b |
|            | -                                                              | SB-SL-<br>SLA4_EPS NEG        | 6.15 ± 0.01a | 0.58 ± 0.1a  | 4.38 ± 0.16b | 0.64 ± 0.26b | 6.15 ± 0.02b | 0.58 ± 0.01a | 3.76 ± 0.26c | 0.62 ± 0.35b |
|            | +                                                              | SB-SL-<br>DSM20193_EPS<br>POS | 6.15 ± 0.02a | 0.59 ± 0.09a | 4.32 ± 0.1b  | 3.3 ± 0.93a  | 6.12 ± 0.02b | 0.59 ± 0.09a | 3.82 ± 0.26c | 1.9 ± 0.56a  |
|            | -                                                              | SB-SL-<br>DSM20193_EPS<br>NEG | 6.16 ± 0.15a | 0.54 ± 0.08a | 4.35 ± 0.16b | 0.62 ± 0.89b | 6.18 ± 0.02b | 0.54 ± 0.08a | 3.78 ± 0.14c | 0.61 ± 0.17b |
|            | +                                                              | SB-SL-<br>DSM20194_EPS<br>POS | 6.13 ± 0.14a | 0.52 ± 0.01a | 4.23 ± 0.16b | 1.9 ± 0.5a   | 6.13 ± 0.02b | 0.52 ± 0.07a | 4.2 ± 0.11b  | 1.67 ± 0.62a |
| <b>350</b> | -                                                              | SB-SL-<br>DSM20194_EPS<br>NEG | 6.16 ± 0.16a | 0.57 ± 0.06a | 4.41 ± 0b    | 0.61 ± 0.91b | 6.16 ± 0.02b | 0.57 ± 0.06a | 4.18 ± 0.26b | 0.61 ± 0.66b |
|            | -                                                              | SB-SL_CT                      | 6.11 ± 0.18a | 0.38 ± 0.02b | 4.79 ± 0a    | 0.43 ± 0.65b | 6.12 ± 0.02b | 0.38 ± 0.03b | 4.61 ± 0.26a | 0.41 ± 0.38b |
|            | +                                                              | SB-SL-B24W                    | 6.1 ± 0.21a  | 0.41 ± 0.05b | 4.21 ± 0.19b | 0.53 ± 0.93b | 6.11 ± 0.02b | 0.41 ± 0.05b | 4.04 ± 0.21b | 0.45 ± 0.39b |
|            | +                                                              | SB-SL-<br>SLA5_EPS POS        | 6.11 ± 0.22a | 0.4 ± 0.06b  | 4.38 ± 0.08b | 0.45 ± 0.71b | 6.12 ± 0.02b | 0.42 ± 0.06b | 3.94 ± 0.23b | 0.48 ± 0.7b  |
|            | -                                                              | SB-SL-<br>SLA5_EPS NEG        | 6.16 ± 0.15a | 0.39 ± 0b    | 4.45 ± 0.21b | 0.41 ± 0.95b | 6.14 ± 0.02b | 0.38 ± 0.07b | 3.91 ± 0.23b | 0.39 ± 0.71b |



|     |   |                        |              |              |              |              |              |              |              |              |
|-----|---|------------------------|--------------|--------------|--------------|--------------|--------------|--------------|--------------|--------------|
| 400 | + | SB-SL-SLA4_EPS POS     | 6.12 ± 0.19a | 0.34 ± 0b    | 4.32 ± 0.2b  | 0.93 ± 0.96b | 6.13 ± 0.02b | 0.35 ± 0.01b | 4 ± 0b       | 0.53 ± 0.34b |
|     | - | SB-SL-SLA4_EPS NEG     | 6.15 ± 0.09a | 0.36 ± 0.07b | 4.37 ± 0.21b | 0.48 ± 0.97b | 6.14 ± 0.03b | 0.39 ± 0.07b | 3.76 ± 0.23c | 0.41 ± 0.44b |
|     | + | SB-SL-DSM20193_EPS POS | 6.14 ± 0.09a | 0.39 ± 0b    | 4.31 ± 0.02b | 3.15 ± 0.98a | 6.11 ± 0.03b | 0.37 ± 0.02b | 3.82 ± 0.21c | 2.15 ± 0.73a |
|     | - | SB-SL-DSM20193_EPS NEG | 6.15 ± 0.08a | 0.41 ± 0.07b | 4.34 ± 0.22b | 0.42 ± 0.57b | 6.17 ± 0.02b | 0.43 ± 0.07b | 3.78 ± 0.2c  | 0.48 ± 0.58b |
|     | + | SB-SL-DSM20194_EPS POS | 6.12 ± 0.05a | 0.35 ± 0.05b | 4.22 ± 0.22b | 1.98 ± 0.47a | 6.13 ± 0.02b | 0.39 ± 0.05b | 4.2 ± 0.18b  | 1.89 ± 0.19a |
|     | - | SB-SL-DSM20194_EPS NEG | 6.15 ± 0.01a | 0.39 ± 0.05b | 4.42 ± 0.01b | 0.43 ± 0.37b | 6.16 ± 0.02b | 0.36 ± 0.04b | 4.18 ± 0.17b | 0.42 ± 0.45b |
|     | - | SB-SL_CT               | 6.12 ± 0.02a | 0.25 ± 0.02b | 4.9 ± 0.21a  | 0.33 ± 0.38b | 6.1 ± 0.02b  | 0.26 ± 0.02b | 4.41 ± 0a    | 0.14 ± 0.25b |
|     | + | SB-SL-B24W             | 6.13 ± 0.01a | 0.26 ± 0.02b | 4.13 ± 0.06b | 0.31 ± 0.08b | 6.12 ± 0b    | 0.24 ± 0b    | 3.72 ± 0.17c | 0.29 ± 0.01b |
|     | + | SB-SL-SLA5_EPS POS     | 6.18 ± 0.03a | 0.23 ± 0.02b | 4.31 ± 0.14b | 0.28 ± 0.39b | 6.14 ± 0.02b | 0.26 ± 0.02b | 4 ± 0.14b    | 0.28 ± 0.44b |
|     | - | SB-SL-SLA5_EPS NEG     | 6.15 ± 0.02a | 0.25 ± 0.02b | 4.36 ± 0.15b | 0.33 ± 0.39b | 6.13 ± 0.01b | 0.28 ± 0.02b | 3.98 ± 0.14b | 0.28 ± 0.23b |
|     | + | SB-SL-SLA4_EPS POS     | 6.16 ± 0.01a | 0.28 ± 0.03b | 4.23 ± 0.03b | 0.32 ± 0.4b  | 6.18 ± 0.04b | 0.27 ± 0.03b | 4.04 ± 0.04b | 0.31 ± 0.44b |
|     | - | SB-SL-SLA4_EPS NEG     | 6.19 ± 0.07a | 0.29 ± 0.04b | 4.18 ± 0.14b | 0.31 ± 0.42b | 6.14 ± 0.02b | 0.29 ± 0.04b | 4.01 ± 0.05b | 0.36 ± 0.17b |
|     | + | SB-SL-DSM20193_EPS POS | 6.12 ± 0.11a | 0.22 ± 0.01b | 4.34 ± 0.12b | 1.3 ± 0.03a  | 6.16 ± 0.05b | 0.23 ± 0.04b | 4.12 ± 0.14b | 1.44 ± 0.45a |
|     | - | SB-SL-DSM20193_EPS NEG | 6.17 ± 0.12a | 0.26 ± 0.04b | 4.37 ± 0.12b | 0.96 ± 0.43b | 6.15 ± 0.06b | 0.25 ± 0.05b | 4.08 ± 0.15b | 0.28 ± 0.31b |

|     |   |                               |                  |                  |                  |                  |                  |                  |                  |                  |
|-----|---|-------------------------------|------------------|------------------|------------------|------------------|------------------|------------------|------------------|------------------|
| 450 | + | SB-SL-<br>DSM20194_EPS<br>POS | $6.13 \pm 0.13a$ | $0.27 \pm 0.04b$ | $4.41 \pm 0.12b$ | $0.92 \pm 0.34b$ | $6.13 \pm 0.02b$ | $0.28 \pm 0.04b$ | $4.11 \pm 0.16b$ | $1.25 \pm 0.31a$ |
|     | - | SB-SL-<br>DSM20194_EPS<br>NEG | $6.1 \pm 0.13a$  | $0.25 \pm 0.03b$ | $4.38 \pm 0.12b$ | $0.27 \pm 0.42b$ | $6.15 \pm 0.02b$ | $0.26 \pm 0b$    | $3.99 \pm 0.17b$ | $0.31 \pm 0.05b$ |
|     | - | SB-SL_CT                      | $6.17 \pm 0.21a$ | $0.24 \pm 0.03b$ | $4.72 \pm 0.12a$ | $0.25 \pm 0.31b$ | $6.16 \pm 0.07b$ | $0.26 \pm 0.04b$ | $4.43 \pm 0.17a$ | $0.34 \pm 0.06b$ |
|     | + | SB-SL-B24W                    | $6.09 \pm 0.15a$ | $0.25 \pm 0.03b$ | $4.31 \pm 0.21b$ | $0.27 \pm 0.43b$ | $6.14 \pm 0.03b$ | $0.25 \pm 0.03b$ | $3.92 \pm 0.23b$ | $0.38 \pm 0b$    |
|     | + | SB-SL-<br>SLA5_EPS POS        | $6.1 \pm 0.15a$  | $0.21 \pm 0.02b$ | $4.5 \pm 0.2b$   | $0.23 \pm 0.43b$ | $6.11 \pm 0.06b$ | $0.23 \pm 0.03b$ | $4 \pm 0.23b$    | $0.33 \pm 0.04b$ |
|     | - | SB-SL-<br>SLA5_EPS NEG        | $6.09 \pm 0.02a$ | $0.19 \pm 0b$    | $4.48 \pm 0.21b$ | $0.22 \pm 0.21b$ | $6.12 \pm 0.03b$ | $0.17 \pm 0.03c$ | $3.98 \pm 0.24b$ | $0.23 \pm 0.03b$ |
|     | + | SB-SL-<br>SLA4_EPS POS        | $6.14 \pm 0.02a$ | $0.17 \pm 0.03b$ | $4.31 \pm 0.21b$ | $0.97 \pm 0.44b$ | $6.18 \pm 0.03b$ | $0.16 \pm 0.03c$ | $4.01 \pm 0.02b$ | $0.26 \pm 0.01b$ |
|     | - | SB-SL-<br>SLA4_EPS NEG        | $6.13 \pm 0.15a$ | $0.15 \pm 0.03b$ | $4.4 \pm 0.2b$   | $0.18 \pm 0.44b$ | $6.15 \pm 0.02b$ | $0.17 \pm 0.03c$ | $4.05 \pm 0.24b$ | $0.21 \pm 0.04b$ |
|     | + | SB-SL-<br>DSM20193_EPS<br>POS | $6.11 \pm 0.01a$ | $0.19 \pm 0.04b$ | $4.47 \pm 0.2b$  | $1.33 \pm 0.44a$ | $6.14 \pm 0b$    | $0.18 \pm 0.04b$ | $3.91 \pm 0.24b$ | $0.28 \pm 0b$    |
|     | - | SB-SL-<br>DSM20193_EPS<br>NEG | $6.1 \pm 0.15a$  | $0.21 \pm 0.04b$ | $4.38 \pm 0.2b$  | $0.23 \pm 0.29b$ | $6.12 \pm 0b$    | $0.22 \pm 0.04b$ | $3.89 \pm 0.23b$ | $0.25 \pm 0.38b$ |
|     | + | SB-SL-<br>DSM20194_EPS<br>POS | $6.12 \pm 0.03a$ | $0.23 \pm 0.04b$ | $4.44 \pm 0.2b$  | $0.91 \pm 0.44b$ | $6.1 \pm 0.03b$  | $0.25 \pm 0.04b$ | $3.8 \pm 0.21c$  | $0.27 \pm 0.38b$ |
|     | - | SB-SL-<br>DSM20194_EPS<br>NEG | $6.15 \pm 0.02a$ | $0.17 \pm 0b$    | $4.39 \pm 0.2b$  | $0.19 \pm 0.24b$ | $6.12 \pm 0.02b$ | $0.19 \pm 0.02b$ | $3.88 \pm 0.23b$ | $0.22 \pm 0.06b$ |
| 500 | - | SB-SL_CT                      | $6.14 \pm 0.15a$ | $0.19 \pm 0.02b$ | $5.03 \pm 0.19a$ | $0.21 \pm 0.44b$ | $6.17 \pm 0.01b$ | $0.18 \pm 0b$    | $4.64 \pm 0.22a$ | $0.21 \pm 0.38b$ |
|     | + | SB-SL-B24W                    | $6.12 \pm 0.15a$ | $0.16 \pm 0.02b$ | $4.42 \pm 0.09b$ | $0.19 \pm 0.16b$ | $6.14 \pm 0.02b$ | $0.17 \pm 0.02c$ | $3.92 \pm 0.11b$ | $0.23 \pm 0.4b$  |
|     | + | SB-SL-<br>SLA5_EPS POS        | $6.11 \pm 0.14a$ | $0.14 \pm 0.14b$ | $4.63 \pm 0.1a$  | $0.17 \pm 0.45b$ | $6.18 \pm 0.04b$ | $0.15 \pm 0.11c$ | $4.13 \pm 0.13b$ | $0.18 \pm 0.13b$ |

|   |                               |              |              |              |              |              |              |              |              |
|---|-------------------------------|--------------|--------------|--------------|--------------|--------------|--------------|--------------|--------------|
| - | SB-SL-<br>SLA5_EPS NEG        | 6.1 ± 0.16a  | 0.13 ± 0.18b | 4.43 ± 0.1b  | 0.15 ± 0.43b | 6.16 ± 0.05b | 0.14 ± 0.15c | 4.08 ± 0.15b | 0.17 ± 0.44b |
| + | SB-SL-<br>SLA4_EPS POS        | 6.13 ± 0.17a | 0.15 ± 0.19b | 4.43 ± 0.11b | 0.97 ± 0.27b | 6.15 ± 0.01b | 0.16 ± 0.16c | 4.12 ± 0.15b | 0.19 ± 0.33b |
| - | SB-SL-<br>SLA4_EPS NEG        | 6.14 ± 0.15a | 0.12 ± 0.21b | 4.36 ± 0b    | 0.18 ± 0.19b | 6.17 ± 0.07b | 0.13 ± 0.17c | 4.09 ± 0.15b | 0.16 ± 0.41b |
| + | DSM20193_EPS<br>POS           | 6.12 ± 0.02a | 0.14 ± 0.21b | 4.61 ± 0.1a  | 1.32 ± 0.35a | 6.14 ± 0.08b | 0.15 ± 0.18c | 4.04 ± 0.15b | 1.4 ± 0.38a  |
| - | SB-SL-<br>DSM20193_EPS<br>NEG | 6.09 ± 0.03a | 0.11 ± 0.2b  | 4.58 ± 0.1b  | 0.16 ± 0.23b | 6.19 ± 0.07b | 0.13 ± 0.11c | 4.11 ± 0.16b | 0.18 ± 0.24b |
| + | SB-SL-<br>DSM20194_EPS<br>POS | 6.15 ± 0.03a | 0.15 ± 0.17b | 4.47 ± 0.11b | 0.9 ± 0.44b  | 6.12 ± 0.01b | 0.17 ± 0.15c | 3.81 ± 0c    | 0.19 ± 0.28b |
| - | SB-SL-<br>DSM20194_EPS<br>NEG | 6.07 ± 0.15a | 0.16 ± 0.13b | 4.49 ± 0.12b | 0.21 ± 0.23b | 6.15 ± 0.05b | 0.18 ± 0.12b | 3.98 ± 0.13b | 0.24 ± 0.24b |

---

**Sprouted barley-native lentil sourdough (40:60 ratio)**

---

|   |                               |              |              |              |              |              |              |              |              |
|---|-------------------------------|--------------|--------------|--------------|--------------|--------------|--------------|--------------|--------------|
| - | SB-L_CT                       | 6.27 ± 0.16a | 0.54 ± 0.02a | 4.65 ± 0.12a | 0.63 ± 0.39b | 6.25 ± 0.02b | 0.49 ± 0.04a | 4.31 ± 0.12a | 0.74 ± 0.37b |
| + | SB-L -B24W                    | 6.26 ± 0.23a | 0.56 ± 0.05a | 4.41 ± 0.14b | 0.71 ± 0.34b | 6.27 ± 0.03b | 0.47 ± 0.05a | 3.83 ± 0.12b | 0.79 ± 0.18b |
| + | SB-L -SLA5_EPS<br>POS         | 6.25 ± 0.22a | 0.54 ± 0.06a | 4.33 ± 0.15b | 0.51 ± 0.22b | 6.28 ± 0.01a | 0.44 ± 0.05b | 4.06 ± 0.02b | 0.61 ± 0.02b |
| - | SB-L -SLA5_EPS<br>NEG         | 6.24 ± 0.16a | 0.51 ± 0.06a | 4.57 ± 0.16b | 0.48 ± 0.39b | 6.33 ± 0.04a | 0.51 ± 0.05a | 4.09 ± 0.12b | 0.64 ± 0.37b |
| + | SB-L -SLA4_EPS<br>POS         | 6.3 ± 0.18a  | 0.52 ± 0a    | 4.54 ± 0.16b | 0.53 ± 0.34b | 6.31 ± 0.04a | 0.58 ± 0.05a | 4.12 ± 0.01b | 0.5 ± 0.27b  |
| - | SB-L -SLA4_EPS<br>NEG         | 6.29 ± 0.14a | 0.53 ± 0.06a | 4.48 ± 0.15b | 0.55 ± 0.39b | 6.29 ± 0.04b | 0.52 ± 0a    | 4.16 ± 0.12b | 0.65 ± 0.35b |
| + | SB-L -<br>DSM20193_EPS<br>POS | 6.26 ± 0.16a | 0.51 ± 0a    | 4.3 ± 0.02b  | 1.77 ± 0.39a | 6.28 ± 0b    | 0.51 ± 0.04a | 4 ± 0.12b    | 1.13 ± 0.03a |

333

|     |   |                               |                  |                  |                  |                  |                  |                  |                  |                  |
|-----|---|-------------------------------|------------------|------------------|------------------|------------------|------------------|------------------|------------------|------------------|
| 350 | - | SB-L -<br>DSM20193_EPS<br>NEG | $6.21 \pm 0.18a$ | $0.52 \pm 0.06a$ | $4.33 \pm 0.16b$ | $0.6 \pm 0.13b$  | $6.25 \pm 0.04b$ | $0.54 \pm 0.04a$ | $4.04 \pm 0.03b$ | $0.49 \pm 0.48b$ |
|     | + | SB-L -<br>DSM20194_EPS<br>POS | $6.22 \pm 0.08a$ | $0.55 \pm 0.06a$ | $4.31 \pm 0.16b$ | $0.63 \pm 0.43b$ | $6.28 \pm 0.03b$ | $0.51 \pm 0.03a$ | $4.11 \pm 0.12b$ | $1.72 \pm 0.18a$ |
|     | - | SB-L -<br>DSM20194_EPS<br>NEG | $6.24 \pm 0.08a$ | $0.55 \pm 0.04a$ | $4.43 \pm 0.03b$ | $0.51 \pm 0.41b$ | $6.29 \pm 0.03b$ | $0.5 \pm 0.03a$  | $4.14 \pm 0.12b$ | $0.63 \pm 0.2b$  |
|     | - | SB-L_CT                       | $6.28 \pm 0.16a$ | $0.39 \pm 0.02b$ | $4.73 \pm 0.16a$ | $0.44 \pm 0.22b$ | $6.23 \pm 0.02b$ | $0.43 \pm 0.03b$ | $4.29 \pm 0.12a$ | $0.84 \pm 0.5b$  |
|     | + | SB-L -B24W                    | $6.3 \pm 0.01a$  | $0.42 \pm 0.03b$ | $4.23 \pm 0.12b$ | $0.58 \pm 0.44b$ | $6.23 \pm 0.02b$ | $0.42 \pm 0.02b$ | $3.81 \pm 0.15c$ | $0.79 \pm 0.53b$ |
|     | + | SB-L -SLA5_EPS<br>POS         | $6.24 \pm 0.02a$ | $0.41 \pm 0.02b$ | $4.23 \pm 0.14b$ | $0.76 \pm 0.16b$ | $6.21 \pm 0.02b$ | $0.47 \pm 0.05a$ | $4.04 \pm 0.14b$ | $0.95 \pm 0.26b$ |
|     | - | SB-L -SLA5_EPS<br>NEG         | $6.26 \pm 0.01a$ | $0.45 \pm 0.05a$ | $4.35 \pm 0.01b$ | $0.47 \pm 0.47b$ | $6.22 \pm 0.02b$ | $0.5 \pm 0.06a$  | $4.07 \pm 0.15b$ | $0.64 \pm 0.57b$ |
|     | + | SB-L -SLA4_EPS<br>POS         | $6.29 \pm 0.01a$ | $0.46 \pm 0.06a$ | $4.24 \pm 0.04b$ | $0.59 \pm 0.38b$ | $6.19 \pm 0.02b$ | $0.44 \pm 0.07b$ | $4.1 \pm 0.15b$  | $0.84 \pm 0.29b$ |
|     | - | SB-L -SLA4_EPS<br>NEG         | $6.32 \pm 0.02a$ | $0.45 \pm 0.01a$ | $4.26 \pm 0.05b$ | $0.48 \pm 0.45b$ | $6.21 \pm 0.02b$ | $0.51 \pm 0a$    | $4.14 \pm 0.09b$ | $0.65 \pm 0.49b$ |
|     | + | SB-L -<br>DSM20193_EPS<br>POS | $6.25 \pm 0.15a$ | $0.41 \pm 0.05b$ | $4.2 \pm 0.01b$  | $1.89 \pm 0.47a$ | $6.2 \pm 0.02b$  | $0.49 \pm 0.06a$ | $3.98 \pm 0.16b$ | $1.93 \pm 0.59a$ |
|     | - | SB-L -<br>DSM20193_EPS<br>NEG | $6.23 \pm 0.11a$ | $0.44 \pm 0.05a$ | $4.24 \pm 0.06b$ | $0.59 \pm 0.51b$ | $6.23 \pm 0.02b$ | $0.48 \pm 0a$    | $4.02 \pm 0.16b$ | $0.53 \pm 0.19b$ |
|     | + | SB-L -<br>DSM20194_EPS<br>POS | $6.27 \pm 0.12a$ | $0.43 \pm 0b$    | $4.21 \pm 0.09b$ | $0.84 \pm 0.52b$ | $6.23 \pm 0.02b$ | $0.44 \pm 0.05b$ | $4.09 \pm 0.17b$ | $1.81 \pm 0.49a$ |
|     | - | SB-L -<br>DSM20194_EPS<br>NEG | $6.23 \pm 0.05a$ | $0.42 \pm 0.03b$ | $4.31 \pm 0.08b$ | $0.53 \pm 0.54b$ | $6.2 \pm 0.02b$  | $0.42 \pm 0.04b$ | $4.12 \pm 0.07b$ | $0.66 \pm 0.32b$ |
| 400 | - | SB-L_CT                       | $6.27 \pm 0.02a$ | $0.35 \pm 0.02b$ | $4.59 \pm 0.07a$ | $0.3 \pm 0.41b$  | $6.18 \pm 0.03b$ | $0.36 \pm 0.01b$ | $4.42 \pm 0.16a$ | $0.37 \pm 0.33b$ |

|            |   |                               |                  |                  |                  |                  |                  |                  |                  |                  |
|------------|---|-------------------------------|------------------|------------------|------------------|------------------|------------------|------------------|------------------|------------------|
|            | + | SB-L -B24W                    | $6.21 \pm 0.21a$ | $0.32 \pm 0.04b$ | $4.01 \pm 0.17c$ | $0.33 \pm 0.54b$ | $6.2 \pm 0.02b$  | $0.38 \pm 0.05b$ | $3.89 \pm 0.18b$ | $0.39 \pm 0.35b$ |
|            | + | SB-L -SLA5_EPS<br>POS         | $6.19 \pm 0.13a$ | $0.33 \pm 0.06b$ | $4.22 \pm 0.02b$ | $0.32 \pm 0.51b$ | $6.19 \pm 0.02b$ | $0.32 \pm 0.06b$ | $3.92 \pm 0.19b$ | $0.41 \pm 0.08b$ |
|            | - | SB-L -SLA5_EPS<br>NEG         | $6.21 \pm 0.16a$ | $0.31 \pm 0.06b$ | $4.25 \pm 0.15b$ | $0.39 \pm 0.53b$ | $6.21 \pm 0.02b$ | $0.34 \pm 0b$    | $3.97 \pm 0.04b$ | $0.37 \pm 0.37b$ |
|            | + | SB-L -SLA4_EPS<br>POS         | $6.22 \pm 0.02a$ | $0.32 \pm 0b$    | $4.19 \pm 0.14b$ | $0.48 \pm 0.29b$ | $6.18 \pm 0.02b$ | $0.31 \pm 0.01b$ | $3.9 \pm 0.21b$  | $0.8 \pm 0.27b$  |
|            | - | SB-L -SLA4_EPS<br>NEG         | $6.24 \pm 0.03a$ | $0.37 \pm 0.06b$ | $4.23 \pm 0.13b$ | $0.56 \pm 0.54b$ | $6.22 \pm 0.02b$ | $0.36 \pm 0.06b$ | $3.93 \pm 0.2b$  | $0.57 \pm 0.31b$ |
|            | + | SB-L -<br>DSM20193_EPS<br>POS | $6.25 \pm 0.02a$ | $0.31 \pm 0b$    | $4.25 \pm 0.13b$ | $2.11 \pm 0.25a$ | $6.22 \pm 0.02b$ | $0.3 \pm 0.01b$  | $3.88 \pm 0.19b$ | $1.39 \pm 0.37a$ |
|            | - | SB-L -<br>DSM20193_EPS<br>NEG | $6.19 \pm 0.01a$ | $0.34 \pm 0.06b$ | $4.37 \pm 0.12b$ | $0.77 \pm 0.38b$ | $6.21 \pm 0.02b$ | $0.38 \pm 0.06b$ | $3.92 \pm 0.17b$ | $0.75 \pm 0.29b$ |
|            | + | SB-L -<br>DSM20194_EPS<br>POS | $6.23 \pm 0.02a$ | $0.34 \pm 0.01b$ | $4.22 \pm 0.12b$ | $0.68 \pm 0.39b$ | $6.24 \pm 0.03b$ | $0.34 \pm 0.05b$ | $3.9 \pm 0.15b$  | $0.9 \pm 0.29b$  |
|            | - | SB-L -<br>DSM20194_EPS<br>NEG | $6.28 \pm 0.03a$ | $0.38 \pm 0.05b$ | $4.35 \pm 0.11b$ | $0.47 \pm 0.33b$ | $6.24 \pm 0.02b$ | $0.3 \pm 0.04b$  | $3.99 \pm 0.12b$ | $0.38 \pm 0.25b$ |
| <b>450</b> | - | SB-L_CT                       | $6.23 \pm 0.06a$ | $0.22 \pm 0.03b$ | $4.69 \pm 0a$    | $0.27 \pm 0.38b$ | $6.21 \pm 0.02b$ | $0.2 \pm 0.03b$  | $4.48 \pm 0.1a$  | $0.24 \pm 0.13b$ |
|            | + | SB-L -B24W                    | $6.19 \pm 0.15a$ | $0.2 \pm 0b$     | $4.35 \pm 0.19b$ | $0.38 \pm 0.39b$ | $6.18 \pm 0.02b$ | $0.22 \pm 0.01b$ | $4.23 \pm 0.19b$ | $0.28 \pm 0.25b$ |
|            | + | SB-L -SLA5_EPS<br>POS         | $6.21 \pm 0.18a$ | $0.26 \pm 0.03b$ | $4.4 \pm 0.19b$  | $0.4 \pm 0.4b$   | $6.23 \pm 0.02b$ | $0.25 \pm 0.03b$ | $4.2 \pm 0.19b$  | $0.28 \pm 0.25b$ |
|            | - | SB-L -SLA5_EPS<br>NEG         | $6.2 \pm 0.19a$  | $0.3 \pm 0.04b$  | $4.37 \pm 0.2b$  | $0.37 \pm 0.21b$ | $6.2 \pm 0.02b$  | $0.29 \pm 0.04b$ | $4.26 \pm 0.19b$ | $0.34 \pm 0.11b$ |
|            | + | SB-L -SLA4_EPS<br>POS         | $6.19 \pm 0.15a$ | $0.24 \pm 0.03b$ | $4.43 \pm 0.19b$ | $0.91 \pm 0.42b$ | $6.21 \pm 0.02b$ | $0.21 \pm 0.04b$ | $4.18 \pm 0.19b$ | $0.7 \pm 0.27b$  |
|            | - | SB-L -SLA4_EPS<br>NEG         | $6.25 \pm 0.03a$ | $0.25 \pm 0b$    | $4.53 \pm 0.2b$  | $0.33 \pm 0.4b$  | $6.22 \pm 0.02b$ | $0.25 \pm 0.04b$ | $4.16 \pm 0.19b$ | $0.33 \pm 0.24b$ |

|     |   |                               |                  |                  |                  |                  |                  |                  |                  |                  |
|-----|---|-------------------------------|------------------|------------------|------------------|------------------|------------------|------------------|------------------|------------------|
| 500 | + | SB-L -<br>DSM20193_EPS<br>POS | $6.23 \pm 0.06a$ | $0.21 \pm 0.03b$ | $4.39 \pm 0.2b$  | $1.5 \pm 0.41a$  | $6.22 \pm 0b$    | $0.22 \pm 0b$    | $4.2 \pm 0.01b$  | $1 \pm 0.25a$    |
|     | - | SB-L -<br>DSM20193_EPS<br>NEG | $6.21 \pm 0.01a$ | $0.27 \pm 0.03b$ | $4.37 \pm 0.01b$ | $0.25 \pm 0.43b$ | $6.17 \pm 0.01b$ | $0.2 \pm 0.04b$  | $4.13 \pm 0.19b$ | $0.21 \pm 0.05b$ |
|     | + | SB-L -<br>DSM20194_EPS<br>POS | $6.25 \pm 0.16a$ | $0.23 \pm 0.01b$ | $4.42 \pm 0.03b$ | $0.7 \pm 0.41b$  | $6.19 \pm 0.02b$ | $0.24 \pm 0.04b$ | $4.19 \pm 0.18b$ | $0.3 \pm 0.01b$  |
|     | - | SB-L -<br>DSM20194_EPS<br>NEG | $6.23 \pm 0.16a$ | $0.25 \pm 0.01b$ | $4.34 \pm 0.2b$  | $0.42 \pm 0.42b$ | $6.21 \pm 0.02b$ | $0.27 \pm 0.04b$ | $4.22 \pm 0.02b$ | $0.32 \pm 0.05b$ |
|     | - | SB-L_CT                       | $6.25 \pm 0.16a$ | $0.21 \pm 0.03b$ | $4.99 \pm 0.19a$ | $0.24 \pm 0.36b$ | $6.21 \pm 0.02b$ | $0.22 \pm 0.03b$ | $4.78 \pm 0.18a$ | $0.25 \pm 0.03b$ |
|     | + | SB-L -B24W                    | $6.19 \pm 0.15a$ | $0.18 \pm 0.01b$ | $4.38 \pm 0.1b$  | $0.2 \pm 0.28b$  | $6.19 \pm 0.03b$ | $0.21 \pm 0b$    | $4.39 \pm 0.09a$ | $0.24 \pm 0.03b$ |
|     | + | SB-L -SLA5_EPS<br>POS         | $6.22 \pm 0.16a$ | $0.19 \pm 0.03b$ | $4.62 \pm 0.11a$ | $0.21 \pm 0.08b$ | $6.22 \pm 0.03b$ | $0.16 \pm 0.03c$ | $4.2 \pm 0.09b$  | $0.18 \pm 0.04b$ |
|     | - | SB-L -SLA5_EPS<br>NEG         | $6.25 \pm 0.16a$ | $0.17 \pm 0.1c$  | $4.43 \pm 0.08b$ | $0.23 \pm 0.47b$ | $6.18 \pm 0.05b$ | $0.15 \pm 0.11c$ | $4.23 \pm 0.08b$ | $0.16 \pm 0.13b$ |
|     | + | SB-L -SLA4_EPS<br>POS         | $6.24 \pm 0.16a$ | $0.23 \pm 0.12b$ | $4.61 \pm 0.11a$ | $0.25 \pm 0.05b$ | $6.24 \pm 0.03b$ | $0.19 \pm 0.16b$ | $4.41 \pm 0.12a$ | $0.21 \pm 0.17b$ |
|     | - | SB-L -SLA4_EPS<br>NEG         | $6.21 \pm 0.16a$ | $0.25 \pm 0.14b$ | $4.55 \pm 0.1b$  | $0.23 \pm 0.44b$ | $6.22 \pm 0.01b$ | $0.17 \pm 0.01c$ | $4.34 \pm 0.18a$ | $0.19 \pm 0.19b$ |
|     | + | SB-L -<br>DSM20193_EPS<br>POS | $6.23 \pm 0.16a$ | $0.22 \pm 0.16b$ | $4.39 \pm 0.1b$  | $1.56 \pm 0.41a$ | $6.2 \pm 0.03b$  | $0.24 \pm 0.19b$ | $4.19 \pm 0.21b$ | $0.26 \pm 0.2b$  |
|     | - | SB-L -<br>DSM20193_EPS<br>NEG | $6.2 \pm 0.15a$  | $0.26 \pm 0.15b$ | $4.36 \pm 0.12b$ | $0.24 \pm 0.17b$ | $6.17 \pm 0.03b$ | $0.23 \pm 0b$    | $4.21 \pm 0.23b$ | $0.25 \pm 0b$    |
|     | + | SB-L -<br>DSM20194_EPS<br>POS | $6.2 \pm 0.15a$  | $0.18 \pm 0.14b$ | $4.4 \pm 0.04b$  | $0.75 \pm 0.14b$ | $6.19 \pm 0.03b$ | $0.19 \pm 0.17b$ | $4.4 \pm 0.25a$  | $0.21 \pm 0.18b$ |

|                                                              |   |                               |              |              |              |              |              |              |              |              |
|--------------------------------------------------------------|---|-------------------------------|--------------|--------------|--------------|--------------|--------------|--------------|--------------|--------------|
|                                                              | - | SB-L -<br>DSM20194_EPS<br>NEG | 6.21 ± 0.16a | 0.25 ± 0.09b | 4.38 ± 0.13b | 0.27 ± 0.85b | 6.23 ± 0.05b | 0.22 ± 0.12b | 4.29 ± 0.21a | 0.24 ± 0.41b |
| <hr/>                                                        |   |                               |              |              |              |              |              |              |              |              |
| <b>Sprouted barley-native lentil sourdough (30:70 ratio)</b> |   |                               |              |              |              |              |              |              |              |              |
| <b>333</b>                                                   | - | SB-L_CT                       | 6.28 ± 0.16a | 0.48 ± 0.03a | 4.61 ± 0.11a | 0.57 ± 0.33b | 6.26 ± 0.06b | 0.51 ± 0.03a | 4.31 ± 0.19a | 0.56 ± 0.33b |
|                                                              | + | SB-L -B24W                    | 6.25 ± 0.16a | 0.5 ± 0.02a  | 4.38 ± 0.05b | 0.56 ± 0.77b | 6.2 ± 0.06b  | 0.59 ± 0.03a | 4.04 ± 0.16b | 0.61 ± 0.34b |
|                                                              | + | SB-L -SLA5_EPS<br>POS         | 6.24 ± 0.16a | 0.53 ± 0.05a | 4.31 ± 0.17b | 0.53 ± 0.18b | 6.23 ± 0.07b | 0.6 ± 0.06a  | 3.84 ± 0.27b | 0.63 ± 0.36b |
|                                                              | - | SB-L -SLA5_EPS<br>NEG         | 6.26 ± 0.16a | 0.54 ± 0.01a | 4.26 ± 0.18b | 0.53 ± 0.07b | 6.26 ± 0.08b | 0.56 ± 0.02a | 3.84 ± 0.26b | 0.63 ± 0.18b |
|                                                              | + | SB-L -SLA4_EPS<br>POS         | 6.28 ± 0.16a | 0.49 ± 0.06a | 4.23 ± 0.18b | 0.57 ± 0.78b | 6.24 ± 0.08b | 0.55 ± 0.07a | 3.91 ± 0.25b | 0.64 ± 0.39b |
|                                                              | - | SB-L -SLA4_EPS<br>NEG         | 6.29 ± 0.16a | 0.52 ± 0.07a | 4.28 ± 0.01b | 0.64 ± 0.79b | 6.21 ± 0.07b | 0.52 ± 0.08a | 3.76 ± 0.25c | 0.62 ± 0.23b |
|                                                              | + | SB-L -<br>DSM20193_EPS<br>POS | 6.25 ± 0.16a | 0.51 ± 0.08a | 4.22 ± 0.18b | 2.9 ± 0.69a  | 6.12 ± 0.07b | 0.52 ± 0a    | 3.92 ± 0.23b | 1.65 ± 0.22a |
|                                                              | - | SB-L -<br>DSM20193_EPS<br>NEG | 6.22 ± 0.05a | 0.51 ± 0.08a | 4.24 ± 0.17b | 0.62 ± 0.19b | 6.28 ± 0.07a | 0.54 ± 0.08a | 3.86 ± 0.25b | 0.61 ± 0.12b |
|                                                              | + | SB-L -<br>DSM20194_EPS<br>POS | 6.21 ± 0.06a | 0.5 ± 0.07a  | 4.33 ± 0.16b | 0.9 ± 0.73b  | 6.23 ± 0.04b | 0.52 ± 0.07a | 4.2 ± 0.26b  | 0.7 ± 0.5b   |
|                                                              | - | SB-L -<br>DSM20194_EPS<br>NEG | 6.16 ± 0.15a | 0.57 ± 0.07a | 4.31 ± 0.16b | 0.61 ± 0.44b | 6.12 ± 0.02b | 0.57 ± 0.07a | 4.18 ± 0.14b | 0.61 ± 0.26b |
| <b>350</b>                                                   | - | SB-L_CT                       | 6.1 ± 0.02a  | 0.38 ± 0.02b | 4.78 ± 0.16a | 0.43 ± 0.4b  | 6.1 ± 0.02b  | 0.38 ± 0.03b | 4.59 ± 0.26a | 0.41 ± 0.33b |
|                                                              | + | SB-L -B24W                    | 6.09 ± 0.09a | 0.41 ± 0.05b | 4.2 ± 0.19b  | 0.53 ± 0.8b  | 6.09 ± 0.02b | 0.41 ± 0.05b | 4.02 ± 0.21b | 0.33 ± 0.65b |
|                                                              | + | SB-L -SLA5_EPS<br>POS         | 6.1 ± 0.09a  | 0.4 ± 0.06b  | 4.37 ± 0.2b  | 0.39 ± 0.47b | 6.1 ± 0.02b  | 0.42 ± 0.06b | 3.92 ± 0.08b | 0.48 ± 0.15b |

|     |   |                               |                  |                  |                  |                  |                  |                  |                  |                  |
|-----|---|-------------------------------|------------------|------------------|------------------|------------------|------------------|------------------|------------------|------------------|
| 400 | - | SB-L -SLA5_EPS<br>NEG         | $6.15 \pm 0.05a$ | $0.39 \pm 0.07b$ | $4.44 \pm 0.01b$ | $0.41 \pm 0.82b$ | $6.12 \pm 0.02b$ | $0.38 \pm 0.07b$ | $3.89 \pm 0.23b$ | $0.39 \pm 0.66b$ |
|     | + | SB-L -SLA4_EPS<br>POS         | $6.19 \pm 0.06a$ | $0.34 \pm 0.01b$ | $4.31 \pm 0.08b$ | $0.86 \pm 0.83b$ | $6.11 \pm 0.02b$ | $0.35 \pm 0.01b$ | $3.98 \pm 0.03b$ | $0.53 \pm 0.67b$ |
|     | - | SB-L -SLA4_EPS<br>NEG         | $6.14 \pm 0.05a$ | $0.36 \pm 0.07b$ | $4.36 \pm 0.21b$ | $0.43 \pm 0.84b$ | $6.12 \pm 0.03b$ | $0.39 \pm 0.07b$ | $3.74 \pm 0.22c$ | $0.41 \pm 0.71b$ |
|     | + | SB-L -<br>DSM20193_EPS<br>POS | $6.11 \pm 0.11a$ | $0.39 \pm 0.01b$ | $4.34 \pm 0.02b$ | $2.67 \pm 0.59a$ | $6.09 \pm 0.03b$ | $0.37 \pm 0b$    | $3.8 \pm 0.21c$  | $1.95 \pm 0.68a$ |
|     | - | SB-L -<br>DSM20193_EPS<br>NEG | $6.18 \pm 0.15a$ | $0.41 \pm 0.07b$ | $4.33 \pm 0.21b$ | $0.42 \pm 0.57b$ | $6.15 \pm 0.02b$ | $0.43 \pm 0.07b$ | $3.76 \pm 0.2c$  | $0.48 \pm 0.58b$ |
|     | + | SB-L -<br>DSM20194_EPS<br>POS | $6.19 \pm 0.15a$ | $0.35 \pm 0.05b$ | $4.21 \pm 0.22b$ | $1.92 \pm 0.57a$ | $6.11 \pm 0.02b$ | $0.39 \pm 0.05b$ | $4.18 \pm 0.18b$ | $1.88 \pm 0.16a$ |
|     | - | SB-L -<br>DSM20194_EPS<br>NEG | $6.15 \pm 0.17a$ | $0.39 \pm 0.01b$ | $4.41 \pm 0.21b$ | $0.41 \pm 0.38b$ | $6.14 \pm 0.02b$ | $0.36 \pm 0.04b$ | $4.16 \pm 0.17b$ | $0.42 \pm 0.45b$ |
|     | - | SB-L_CT                       | $6.18 \pm 0.22a$ | $0.25 \pm 0.02b$ | $4.89 \pm 0.02a$ | $0.33 \pm 0.39b$ | $6.08 \pm 0.02b$ | $0.26 \pm 0.02b$ | $4.39 \pm 0.17a$ | $0.14 \pm 0.25b$ |
|     | + | SB-L -B24W                    | $6.12 \pm 0.26a$ | $0.26 \pm 0.02b$ | $4.12 \pm 0.16b$ | $0.31 \pm 0.4b$  | $6.1 \pm 0.02b$  | $0.24 \pm 0.02b$ | $3.71 \pm 0.17c$ | $0.29 \pm 0.36b$ |
|     | + | SB-L -SLA5_EPS<br>POS         | $6.17 \pm 0.28a$ | $0.23 \pm 0b$    | $4.3 \pm 0.14b$  | $0.28 \pm 0.2b$  | $6.12 \pm 0.02b$ | $0.26 \pm 0.02b$ | $3.98 \pm 0.14b$ | $0.28 \pm 0.44b$ |
|     | - | SB-L -SLA5_EPS<br>NEG         | $6.14 \pm 0.15a$ | $0.25 \pm 0.02b$ | $4.35 \pm 0.15b$ | $0.33 \pm 0.4b$  | $6.11 \pm 0.02b$ | $0.28 \pm 0.02b$ | $3.96 \pm 0.14b$ | $0.28 \pm 0.23b$ |
|     | + | SB-L -SLA4_EPS<br>POS         | $6.15 \pm 0.16a$ | $0.28 \pm 0.03b$ | $4.22 \pm 0b$    | $0.32 \pm 0.18b$ | $6.16 \pm 0.02b$ | $0.27 \pm 0.03b$ | $4.02 \pm 0.14b$ | $0.31 \pm 0.12b$ |
|     | - | SB-L -SLA4_EPS<br>NEG         | $6.18 \pm 0.01a$ | $0.29 \pm 0.04b$ | $4.17 \pm 0.14b$ | $0.31 \pm 0.43b$ | $6.12 \pm 0.02b$ | $0.29 \pm 0.04b$ | $3.99 \pm 0.14b$ | $0.36 \pm 0.44b$ |
|     | + | SB-L -<br>DSM20193_EPS<br>POS | $6.1 \pm 0.15a$  | $0.22 \pm 0b$    | $4.33 \pm 0.12b$ | $1.36 \pm 0.04a$ | $6.14 \pm 0.02b$ | $0.23 \pm 0b$    | $4.1 \pm 0.14b$  | $1.43 \pm 0.15a$ |



|     |   |                               |                  |                  |                  |                  |                  |                  |                  |                  |
|-----|---|-------------------------------|------------------|------------------|------------------|------------------|------------------|------------------|------------------|------------------|
|     | - | SB-L -<br>DSM20193_EPS<br>NEG | $6.19 \pm 0a$    | $0.26 \pm 0.04b$ | $4.36 \pm 0.12b$ | $0.96 \pm 0.01b$ | $6.13 \pm 0.02b$ | $0.25 \pm 0.05b$ | $4.06 \pm 0.15b$ | $0.28 \pm 0.31b$ |
|     | + | SB-L -<br>DSM20194_EPS<br>POS | $6.21 \pm 0.16a$ | $0.27 \pm 0.04b$ | $4.4 \pm 0b$     | $0.92 \pm 0.13b$ | $6.11 \pm 0.02b$ | $0.28 \pm 0.04b$ | $4.09 \pm 0.16b$ | $1.25 \pm 0.31a$ |
|     | - | SB-L -<br>DSM20194_EPS<br>NEG | $6.17 \pm 0.15a$ | $0.25 \pm 0.03b$ | $4.37 \pm 0.12b$ | $0.27 \pm 0.15b$ | $6.13 \pm 0.02b$ | $0.26 \pm 0.04b$ | $3.97 \pm 0.17b$ | $0.31 \pm 0.05b$ |
| 450 | - | SB-L_CT                       | $6.16 \pm 0.15a$ | $0.24 \pm 0.03b$ | $4.71 \pm 0.12a$ | $0.25 \pm 0.42b$ | $6.14 \pm 0.02b$ | $0.26 \pm 0.04b$ | $4.41 \pm 0.17a$ | $0.34 \pm 0.06b$ |
|     | + | SB-L -B24W                    | $6.08 \pm 0.03a$ | $0.25 \pm 0b$    | $4.3 \pm 0.21b$  | $0.27 \pm 0.11b$ | $6.12 \pm 0.03b$ | $0.25 \pm 0b$    | $3.9 \pm 0.23b$  | $0.38 \pm 0b$    |
|     | + | SB-L -SLA5_EPS<br>POS         | $6.08 \pm 0.15a$ | $0.21 \pm 0.02b$ | $4.49 \pm 0.2b$  | $0.23 \pm 0.16b$ | $6.09 \pm 0.03b$ | $0.23 \pm 0.03b$ | $3.98 \pm 0.23b$ | $0.33 \pm 0.04b$ |
|     | - | SB-L -SLA5_EPS<br>NEG         | $6.05 \pm 0.15a$ | $0.19 \pm 0.03b$ | $4.47 \pm 0.21b$ | $0.22 \pm 0.41b$ | $6.1 \pm 0.03b$  | $0.17 \pm 0.03c$ | $3.96 \pm 0.24b$ | $0.23 \pm 0.03b$ |
|     | + | SB-L -SLA4_EPS<br>POS         | $6.13 \pm 0.03a$ | $0.17 \pm 0.01c$ | $4.3 \pm 0.21b$  | $0.97 \pm 0.02b$ | $6.16 \pm 0.03b$ | $0.16 \pm 0.03c$ | $3.99 \pm 0.24b$ | $0.26 \pm 0b$    |
|     | - | SB-L -SLA4_EPS<br>NEG         | $6.12 \pm 0.01a$ | $0.15 \pm 0.01c$ | $4.39 \pm 0.2b$  | $0.18 \pm 0.42b$ | $6.13 \pm 0.02b$ | $0.17 \pm 0.03c$ | $4.03 \pm 0.24b$ | $0.21 \pm 0.04b$ |
|     | + | SB-L -<br>DSM20193_EPS<br>POS | $6.1 \pm 0.05a$  | $0.19 \pm 0.04b$ | $4.46 \pm 0b$    | $1.24 \pm 0.42a$ | $6.12 \pm 0.03b$ | $0.18 \pm 0.04b$ | $3.89 \pm 0.24b$ | $0.28 \pm 0.04b$ |
|     | - | SB-L -<br>DSM20193_EPS<br>NEG | $6.09 \pm 0.16a$ | $0.21 \pm 0.04b$ | $4.37 \pm 0.2b$  | $0.23 \pm 0.6b$  | $6.1 \pm 0.03b$  | $0.22 \pm 0.04b$ | $3.87 \pm 0.23b$ | $0.25 \pm 0.38b$ |
|     | + | SB-L -<br>DSM20194_EPS<br>POS | $6.11 \pm 0.18a$ | $0.23 \pm 0b$    | $4.43 \pm 0.2b$  | $0.91 \pm 0.08b$ | $6.08 \pm 0.03b$ | $0.25 \pm 0.04b$ | $3.78 \pm 0.13c$ | $0.27 \pm 0.02b$ |
|     | - | SB-L -<br>DSM20194_EPS<br>NEG | $6.14 \pm 0.19a$ | $0.17 \pm 0.02c$ | $4.38 \pm 0.2b$  | $0.19 \pm 0.19b$ | $6.1 \pm 0.02b$  | $0.19 \pm 0.02b$ | $3.86 \pm 0.22b$ | $0.22 \pm 0.38b$ |
| 500 | - | SB-L_CT                       | $6.13 \pm 0.21a$ | $0.19 \pm 0.02b$ | $5.02 \pm 0.19a$ | $0.21 \pm 0.14b$ | $6.15 \pm 0.02b$ | $0.18 \pm 0.02b$ | $4.62 \pm 0.22a$ | $0.21 \pm 0.18b$ |
|     | + | SB-L -B24W                    | $6.11 \pm 0.22a$ | $0.16 \pm 0c$    | $4.41 \pm 0.09b$ | $0.19 \pm 0.17b$ | $6.12 \pm 0.02b$ | $0.17 \pm 0.02c$ | $3.9 \pm 0.08b$  | $0.23 \pm 0.4b$  |

|   |                               |              |              |              |              |              |              |              |              |
|---|-------------------------------|--------------|--------------|--------------|--------------|--------------|--------------|--------------|--------------|
| + | SB-L -SLA5_EPS<br>POS         | 6.1 ± 0.21a  | 0.14 ± 0.02c | 4.62 ± 0.1a  | 0.17 ± 0.48b | 6.16 ± 0.02b | 0.15 ± 0.02c | 4.11 ± 0.11b | 0.18 ± 0.13b |
| - | SB-L -SLA5_EPS<br>NEG         | 6.09 ± 0.22a | 0.13 ± 0.02c | 4.42 ± 0.09b | 0.15 ± 0.9b  | 6.14 ± 0.02b | 0.14 ± 0c    | 4.06 ± 0.11b | 0.17 ± 0.46b |
| + | SB-L -SLA4_EPS<br>POS         | 6.12 ± 0.06a | 0.15 ± 0.02c | 4.42 ± 0.09b | 0.97 ± 0.33b | 6.13 ± 0b    | 0.16 ± 0c    | 4.1 ± 0.01b  | 0.19 ± 0.49b |
| - | SB-L -SLA4_EPS<br>NEG         | 6.13 ± 0.08a | 0.12 ± 0.01c | 4.35 ± 0.1b  | 0.18 ± 0.53b | 6.15 ± 0.03b | 0.13 ± 0c    | 4.07 ± 0.12b | 0.16 ± 0.14b |
| + | SB-L -<br>DSM20193_EPS<br>POS | 6.11 ± 0.15a | 0.14 ± 0c    | 4.6 ± 0.07a  | 1.32 ± 0.56a | 6.12 ± 0.03b | 0.15 ± 0.02c | 4.02 ± 0.13b | 1.39 ± 0.6a  |
| - | SB-L -<br>DSM20193_EPS<br>NEG | 6.08 ± 0.18a | 0.11 ± 0.03c | 4.57 ± 0.06b | 0.16 ± 0.41b | 6.17 ± 0.03b | 0.13 ± 0.03c | 4.09 ± 0.15b | 0.18 ± 0.03b |
| + | SB-L -<br>DSM20194_EPS<br>POS | 6.14 ± 0.15a | 0.15 ± 0.01c | 4.46 ± 0.01b | 0.9 ± 0.49b  | 6.1 ± 0.02b  | 0.17 ± 0.01c | 3.79 ± 0.12c | 0.19 ± 0.04b |
| - | SB-L -<br>DSM20194_EPS<br>NEG | 6.06 ± 0.15a | 0.16 ± 0.01c | 4.48 ± 0.06b | 0.21 ± 0.22b | 6.13 ± 0.01b | 0.18 ± 0.04b | 3.96 ± 0.15b | 0.24 ± 0.18b |

<sup>1</sup>D.W., dough weight. Data are mean values of triplicate determination ± standard deviation. a-c means within a column with different letters are significantly different (P <0.05)
